# Supplementary material for: Effect of strain on the electronic structure and polaronic conductivity of LiFePO4
Source: Royal Society of Chemistry journal article supplement (doi:10.1039/d4cp03106g), 2024-12-26
Supplement: d4cp03106g1.pdf [file d4cp03106g1.pdf]

## ***Electronic Supplementary Information (ESI):***

### **Effect of Strain on Electronic Structure and Polaronic Conductivity in LiFePO<sub>4</sub>**

**Manisha<sup>1</sup>, Mukul Gupta<sup>2</sup> V. Raghavendra Reddy<sup>2</sup> and Sevi Murugavel<sup>1\*</sup>**

<sup>1</sup>*Department of Physics & Astrophysics, University of Delhi, Delhi 110007, India*

<sup>2</sup>*UGC-DAE Consortium for Scientific Research, University Campus, Khandwa Road, Indore 452 001, India*

**Table TS1.** Synthesis conditions adopted for synthesizing LiFePO<sub>4</sub> samples

| Specimen Code | Temperature (K) | Calcination duration (hr) |
|---------------|-----------------|---------------------------|
| S1            | 1023            | 15                        |
| S2            | 973             | 12                        |
| S3            | 1023            | 06                        |

**Table TS2.** Rietveld refinement parameters of LFP sample

| Specimen Code               |                   |                 | S1              |                 |           |
|-----------------------------|-------------------|-----------------|-----------------|-----------------|-----------|
| Wavelength                  |                   |                 | 0.7177 Å        |                 |           |
| Space group                 |                   |                 | <i>Pnma</i>     |                 |           |
| Lattice parameter           |                   |                 |                 |                 |           |
| a (Å)                       |                   | b (Å)           |                 | c (Å)           |           |
| 10.3397 ± 0.0002            |                   | 6.0127 ± 0.0001 |                 | 4.6956 ± 0.0001 |           |
| Volume (Å <sup>3</sup> )    |                   |                 | 291.925 ± 0.009 |                 |           |
| Li <sup>+</sup> Vacancy (%) |                   |                 | 1.06%           |                 |           |
| R <sub>p</sub> (%)          |                   |                 | 3.86%           |                 |           |
| R <sub>wp</sub> (%)         |                   |                 | 5.34%           |                 |           |
| GOF (χ <sup>2</sup> )       |                   |                 | 4.823           |                 |           |
| Site                        | Wyckoff Positions | x/a             | y/b             | z/c             | Occupancy |
| Li                          | 4a                | 0.0000          | 0.0000          | 0.0000          | 0.9894    |
| Fe                          | 4c                | 0.2821          | 0.25            | 0.9742          | 0.9661    |
| Fe                          | 4a                | 0.0000          | 0.0000          | 0.0000          | 0.0037    |
| P                           | 4c                | 0.0957          | 0.25            | 0.4168          | 1.0000    |
| O                           | 4c                | 0.0969          | 0.2500          | 0.7443          | 1.0000    |
| O                           | 4c                | 0.4544          | 0.2500          | 0.2156          | 1.0000    |
| O                           | 8d                | 0.1666          | 0.0465          | 0.2795          | 1.0000    |

|                             |                   |                 |                 |                 |           |
|-----------------------------|-------------------|-----------------|-----------------|-----------------|-----------|
| Specimen code               |                   |                 | S2              |                 |           |
| Wavelength                  |                   |                 | 0.7134 Å        |                 |           |
| Space group                 |                   |                 | <i>Pnma</i>     |                 |           |
| Lattice parameter           |                   |                 |                 |                 |           |
| a (Å)                       |                   | b (Å)           |                 | c (Å)           |           |
| 10.3553 ± 0.0002            |                   | 6.0226 ± 0.0001 |                 | 4.7026 ± 0.0001 |           |
| Volume (Å <sup>3</sup> )    |                   |                 | 293.284 ± 0.006 |                 |           |
| Li <sup>+</sup> Vacancy (%) |                   |                 | 0.3 %           |                 |           |
| R <sub>p</sub> (%)          |                   |                 | 3.07%           |                 |           |
| R <sub>wp</sub> (%)         |                   |                 | 4.36%           |                 |           |
| GOF (χ <sup>2</sup> )       |                   |                 | 2.994           |                 |           |
| Site                        | Wyckoff Positions | x/a             | y/b             | z/c             | Occupancy |
| Li                          | 4a                | 0.0000          | 0.0000          | 0.0000          | 0.9970    |
| Fe                          | 4c                | 0.28183(8)      | 0.2500          | 0.9739(26)      | 0.9984    |
| Fe                          | 4a                | 0.0000          | 0.0000          | 0.0000          | 0.0017    |
| P                           | 4c                | 0.09480(19)     | 0.2500          | 0.4172(4)       | 1.0000    |
| O                           | 4c                | 0.0962(4)       | 0.2500          | 0.7436(7)       | 1.0000    |
| O                           | 4c                | 0.4561(5)       | 0.2500          | 0.2094(7)       | 1.0000    |
| O                           | 8d                | 0.1669(34)      | 0.0456(5)       | 0.2852(5)       | 1.0000    |

|                             |                   |                 |                 |                 |           |
|-----------------------------|-------------------|-----------------|-----------------|-----------------|-----------|
| Specimen Code               |                   |                 | S3              |                 |           |
| Wavelength                  |                   |                 | 0.7134 Å        |                 |           |
| Space group                 |                   |                 | <i>Pnma</i>     |                 |           |
| Lattice parameter           |                   |                 |                 |                 |           |
| a (Å)                       |                   | b (Å)           |                 | c (Å)           |           |
| 10.3538 ± 0.0002            |                   | 6.0204 ± 0.0002 |                 | 4.7063 ± 0.0001 |           |
| Volume (Å <sup>3</sup> )    |                   |                 | 293.100 ± 0.008 |                 |           |
| Li <sup>+</sup> Vacancy (%) |                   |                 | 1.54 %          |                 |           |
| R <sub>p</sub> (%)          |                   |                 | 3.27%           |                 |           |
| R <sub>wp</sub> (%)         |                   |                 | 4.46%           |                 |           |
| GOF (χ <sup>2</sup> )       |                   |                 | 3.809           |                 |           |
| Site                        | Wyckoff Positions | x/a             | y/b             | z/c             | Occupancy |
| Li                          | 4a                | 0.0000          | 0.0000          | 0.0000          | 0.9846    |
| Fe                          | 4c                | 0.2827          | 0.2500          | 0.9737          | 0.9996    |
| Fe                          | 4a                | 0.0000          | 0.0000          | 0.0000          | 0.0000    |
| P                           | 4c                | 0.2803          | 0.2500          | 0.9766          | 1.0000    |
| O                           | 4c                | 0.0953          | 0.2500          | 0.4160          | 1.0000    |
| O                           | 4c                | 0.4564          | 0.2500          | 0.2087          | 1.0000    |
| O                           | 8d                | 0.1651          | 0.0464          | 0.2836          | 1.0000    |

**Table TS3.** Interatomic distances and bond angles evaluated from the Rietveld refinement

|                          | <b>S1</b>      | <b>S2</b>      | <b>S3</b>      |
|--------------------------|----------------|----------------|----------------|
| <b>Fe-Octahedron</b>     |                |                |                |
| <b>Fe-O (1)</b>          | 1 x 2.19875(5) | 1 x 2.206(4)   | 1 x 2.223(5)   |
| <b>Fe-O (2)</b>          | 1 x 2.11162(4) | 1 x 2.117(5)   | 1 x 2.112(5)   |
| <b>Fe-O (3)</b>          | 2 x 2.07274(4) | 2 x 2.0607(29) | 2 x 2.0675(32) |
| <b>Fe-O (3')</b>         | 2 x 2.23098(4) | 2 x 2.2508(27) | 2 x 2.2594(30) |
| <b>Average Fe-O Bond</b> | 2.1529         | 2.1576         | 2.1648         |
| <b>Li- Octahedron</b>    |                |                |                |
| <b>Li-O (1)</b>          | 2 x 2.16890(4) | 2 x 2.1709(27) | 2 x 2.1908(32) |
| <b>Li-O (2)</b>          | 2 x 2.06518(4) | 2 x 2.0827(25) | 2 x 2.0847(28) |
| <b>Li-O (3)</b>          | 2 x 2.18363(4) | 2 x 2.2034(33) | 2 x 2.188(4)   |
| <b>Average Li-O</b>      | 2.13923        | 2.15233        | 2.1545         |
| <b>P Tetrahedron</b>     |                |                |                |
| <b>P-O (1)</b>           | 1 x 1.53812(4) | 1 x 1.5365(32) | 1 x 1.508(4)   |
| <b>P-O (2)</b>           | 1 x 1.58714(4) | 1 x 1.555(5)   | 1 x 1.551(6)   |
| <b>P-O (3)</b>           | 2 x 1.56528(3) | 2 x 1.5682(32) | 2 x 1.5537(35) |
| <b>Average P-O Bond</b>  | 1.563955       | 1.5569         | 1.5416         |
| <b>Bond angle</b>        |                |                |                |
| <b>O (1)-Fe-O (2)</b>    | 177.984(0)     | 177.83(14)     | 180.000(1)     |

**Table TS4.** The isomer shift ( $\delta$ ), quadrupole splitting ( $\Delta E_Q$ : doublet), outer line-width ( $\Gamma$ ) and relative areas ( $R_A$ ) in percentage of different sites of  $\text{Fe}^{3+}$  or  $\text{Fe}^{2+}$  ions for all five samples derived from Mössbauer spectra recorded at room temperature. Isomer shift values are relative to Fe metal foil ( $\delta = 0.0 \text{ mms}^{-1}$ ).  $\chi^2$ : goodness of fit.

| <b>Specimen Code</b> | <b>Iron Sites</b>          | $\delta$<br>( $\text{mms}^{-1}$ ) | $\Delta E_Q$<br>( $\text{mms}^{-1}$ ) | $\Gamma$<br>( $\text{mms}^{-1}$ ) | $R_A$<br>(%) | $\chi^2$ |
|----------------------|----------------------------|-----------------------------------|---------------------------------------|-----------------------------------|--------------|----------|
| <b>S1</b>            | Doublet-A $\text{Fe}^{2+}$ | 1.2485                            | 2.9914                                | 0.3556                            | 92.82%       | 1.50     |
|                      | Doublet-B $\text{Fe}^{3+}$ | 0.4772                            | 0.6309                                | 0.3912                            | 7.18%        |          |
| <b>S2</b>            | Doublet-A $\text{Fe}^{2+}$ | 1.2353                            | 2.9882                                | 0.3746                            | 96.30%       | 0.89     |
|                      | Doublet-B $\text{Fe}^{3+}$ | 0.4367                            | 0.7580                                | 0.3947                            | 3.70%        |          |
| <b>S3</b>            | Doublet-A $\text{Fe}^{2+}$ | 1.2543                            | 2.9914                                | 0.3603                            | 99.22%       | 1.35     |
|                      | Doublet-B $\text{Fe}^{3+}$ | 0.4203                            | 0.8621                                | 0.3933                            | 0.78%        |          |

**Table TS5.** Simulated parameters for  $D_{4h}$  symmetry for the different LFP samples

| Specimen Code | $10Dq(\text{eV})$<br>(Fe L edge) | $D_s(\text{eV})$ | $D_t(\text{eV})$ | $\Delta t_{2g}(\text{eV})$<br>( $3D_s-5D_t$ ) | $\Delta e_g(\text{eV})$<br>( $3D_s + 5D_t$ ) |
|---------------|----------------------------------|------------------|------------------|-----------------------------------------------|----------------------------------------------|
| S1            | 1                                | 0.48             | 0.05             | 1.19                                          | 1.69                                         |
| S2            | 0.9                              | 0.52             | 0.01             | 1.51                                          | 1.61                                         |
| S3            | 1.1                              | 0.48             | 0.06             | 1.14                                          | 1.74                                         |

**Table TS5:** Fe 3d orbital energies in LFP with  $D_{4h}$  symmetry calculated for different micro strain samples.

| Specimen Code | $b_{1g}(\text{eV})$ | $a_{1g}(\text{eV})$ | $b_{2g}(\text{eV})$ | $e_g(\text{eV})$ |
|---------------|---------------------|---------------------|---------------------|------------------|
| S1            | 1.51                | -0.66               | 0.51                | -1.13            |
| S2            | 1.57                | -0.56               | 0.67                | -0.84            |
| S3            | 1.56                | -0.66               | 0.46                | -0.68            |

**Table TS7.** Important Mott parameters related to electronic dc conductivity estimated by the

| Specimen Code | $\nu_{ph}$<br>(Hz)<br>$10^{13}$ | $E_a^{HT}$<br>(eV)   | $E_a^{IT}$<br>(eV)   | $E_a^{LT}$ (eV)       | Polaron Concentration | Coupling Constant | $\sigma_{(dc)}$<br>( $\text{Scm}^{-1}$ )<br>at<br>303K |
|---------------|---------------------------------|----------------------|----------------------|-----------------------|-----------------------|-------------------|--------------------------------------------------------|
| S1            | 1.12                            | 0.661<br>$\pm 0.012$ | 0.563<br>$\pm 0.014$ | 0.470<br>$\pm 0.019$  | 0.0071                | 14.35             | $3.216 \cdot 10^{-8}$                                  |
| S2            | 2.25                            | 0.642<br>$\pm 0.013$ | 0.547<br>$\pm 0.011$ | 0.468<br>$\pm 0.018$  | 0.006                 | 13.98             | $4.206 \cdot 10^{-8}$                                  |
| S3            | 1.56                            | 0.506<br>$\pm 0.017$ | 0.465<br>$\pm 0.004$ | 0.414<br>$\pm 0.0004$ | 0.019                 | 11.89             | $1.242 \cdot 10^{-7}$                                  |

Mott model.

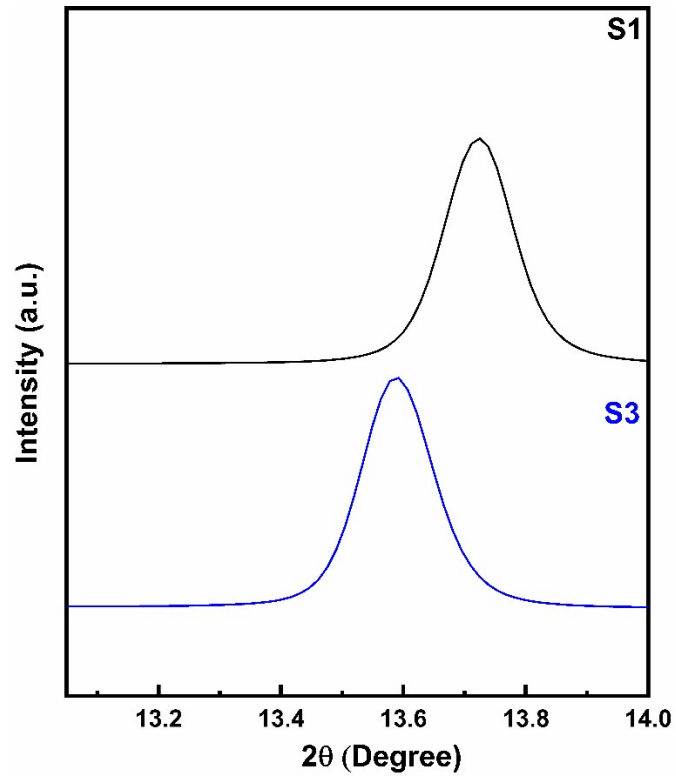

**Figure S1.** Magnified (211/020) diffraction peak showing broadening and shift towards lower angle with increasing strain

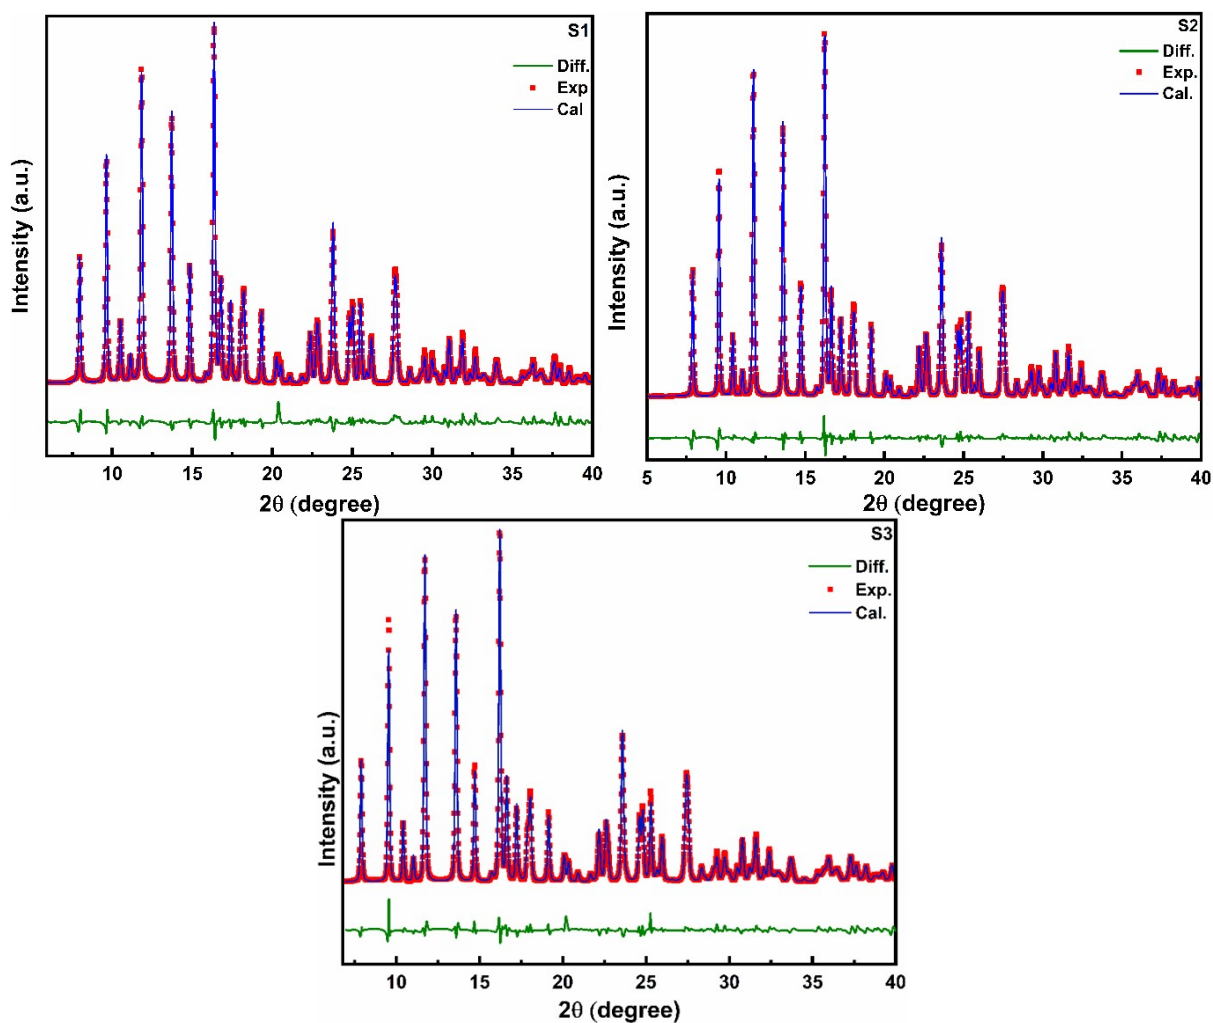

**Figure S2.** Experimental HRXRD pattern (squares in red color) of  $\text{LiFePO}_4$ , compared with theoretical line profile by Rietveld Refinement (continuous line in blue color), a difference of experimental and theoretical curve is represented by the continuous line in green color. Vertical markers in pink color indicate Bragg's reflection for orthorhombic  $\text{LiFePO}_4$

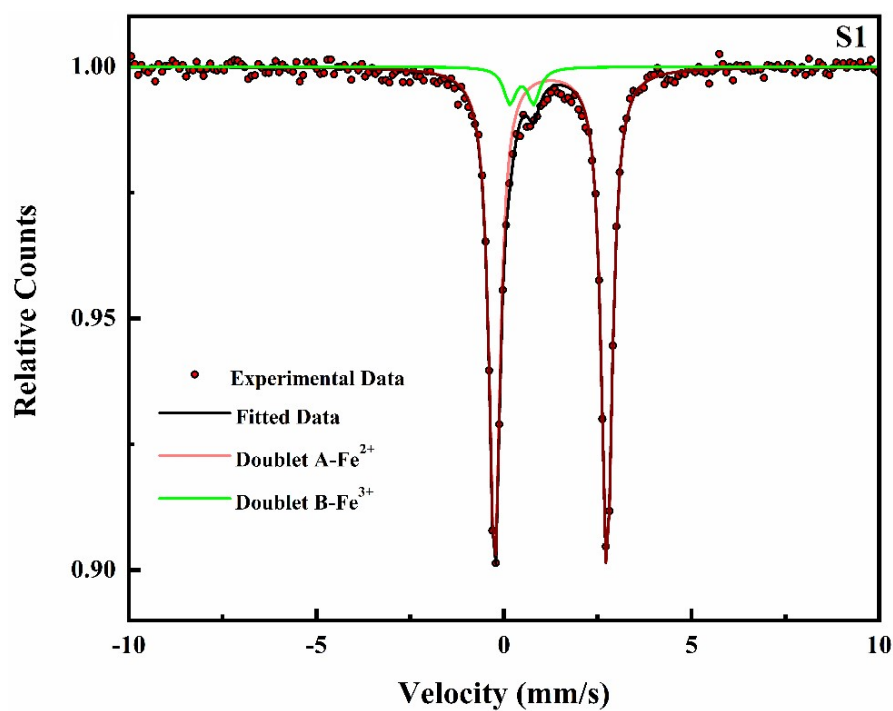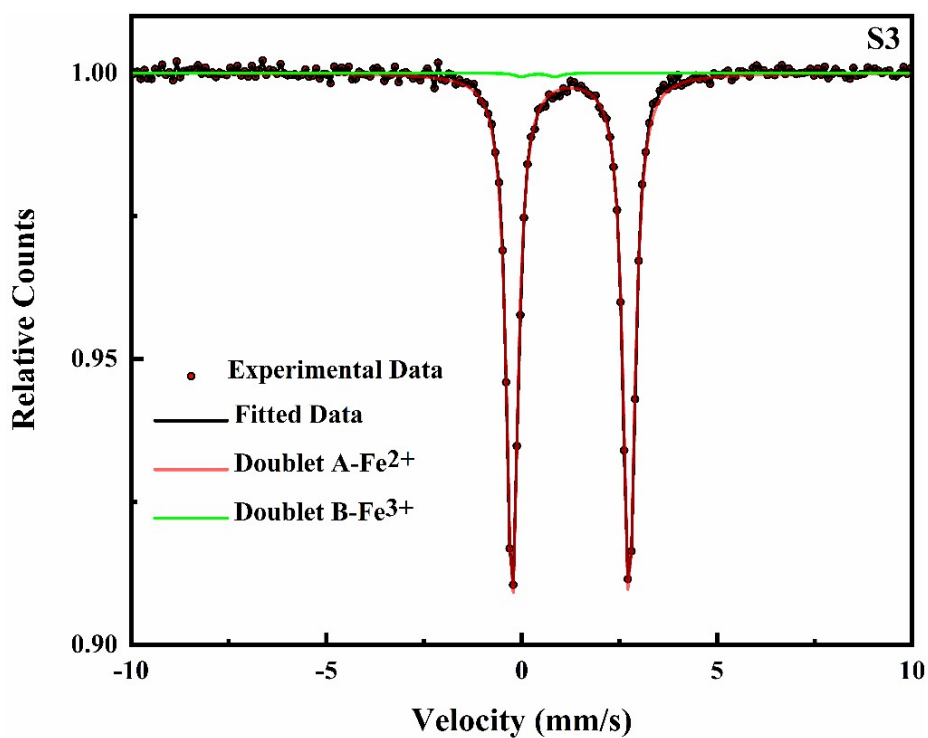

**Fig. S3.** Fitted  $^{57}\text{Fe}$  Mössbauer spectra along with experimental spectra for S1 and S2 specimens. The red-filled circles represent the experimental data and the black solid line indicates the fitted spectra. The green and red solid lines correspond to the contributions from the predominant  $\text{Fe}^{2+}$  and the trace  $\text{Fe}^{3+}$  species, respectively.

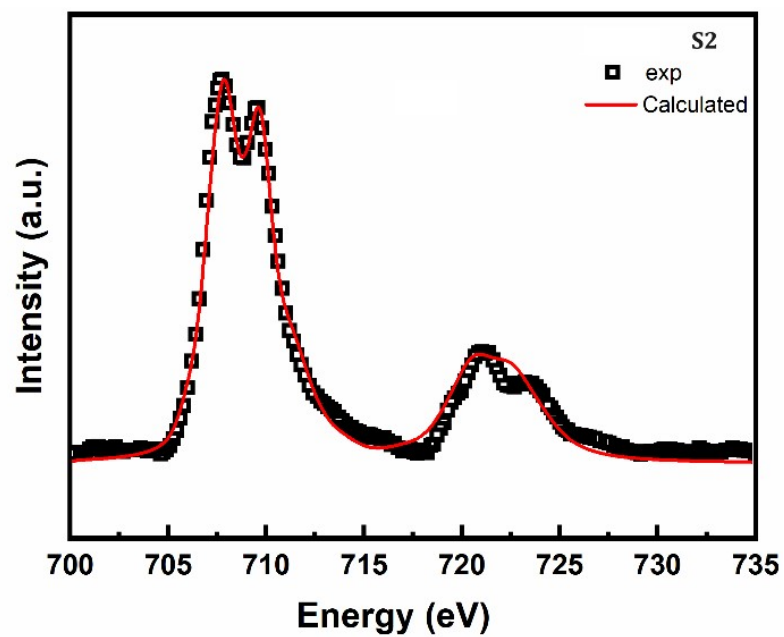

**Figure S4.** Simulated Fe L edge XAS spectra along with the experimental spectra. Square symbol represents the experimental spectra of S2 LFP specimen and solid red line represents the simulated spectra with the CTM4XAS software



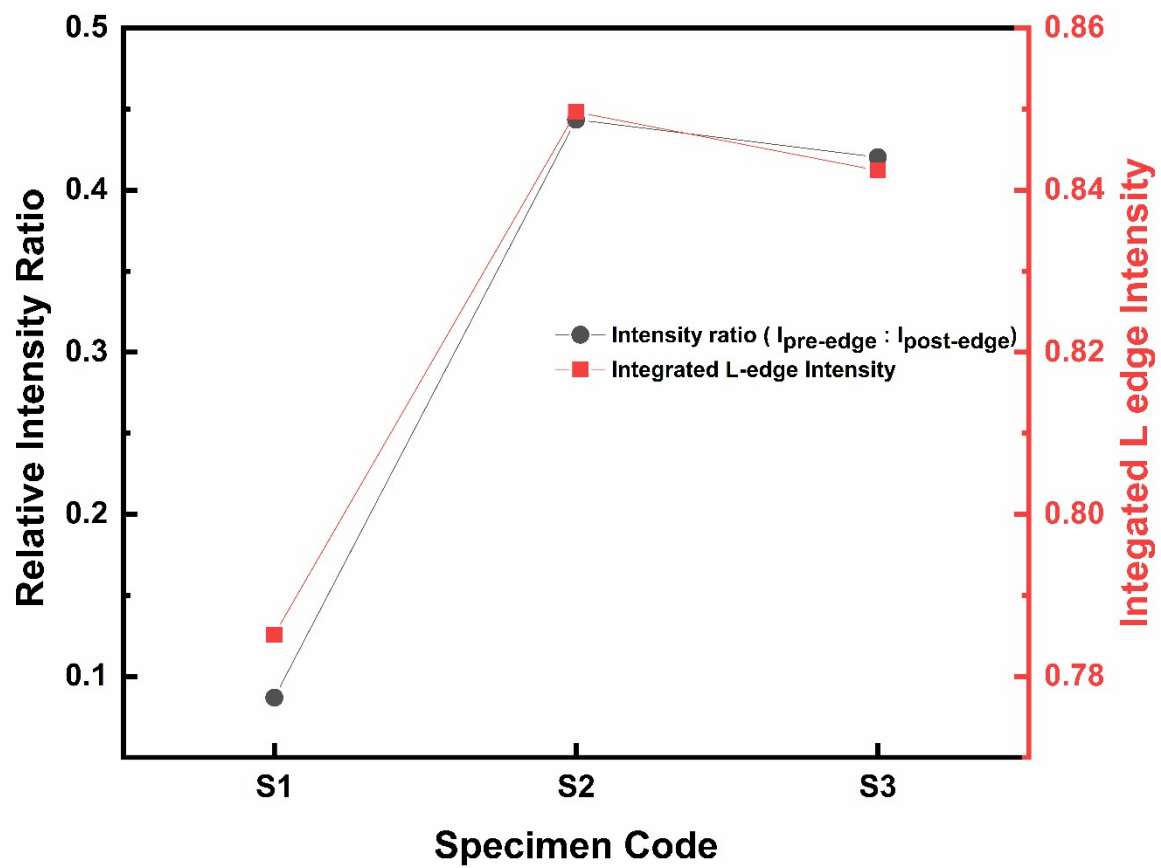

**Figure S5.** The variation of intensity ratio of pre-edge to post-edge of the O k edge and integrated Fe L edge intensity of XAS spectra for different specimens

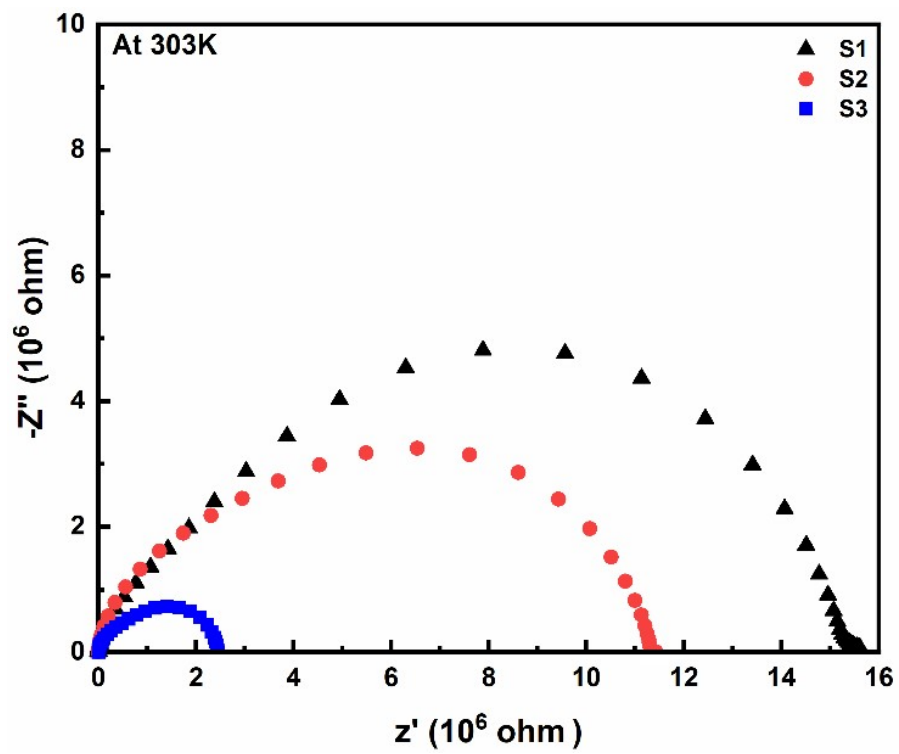

Figure S6. Nyquist plot of different LFP samples at 303 K.

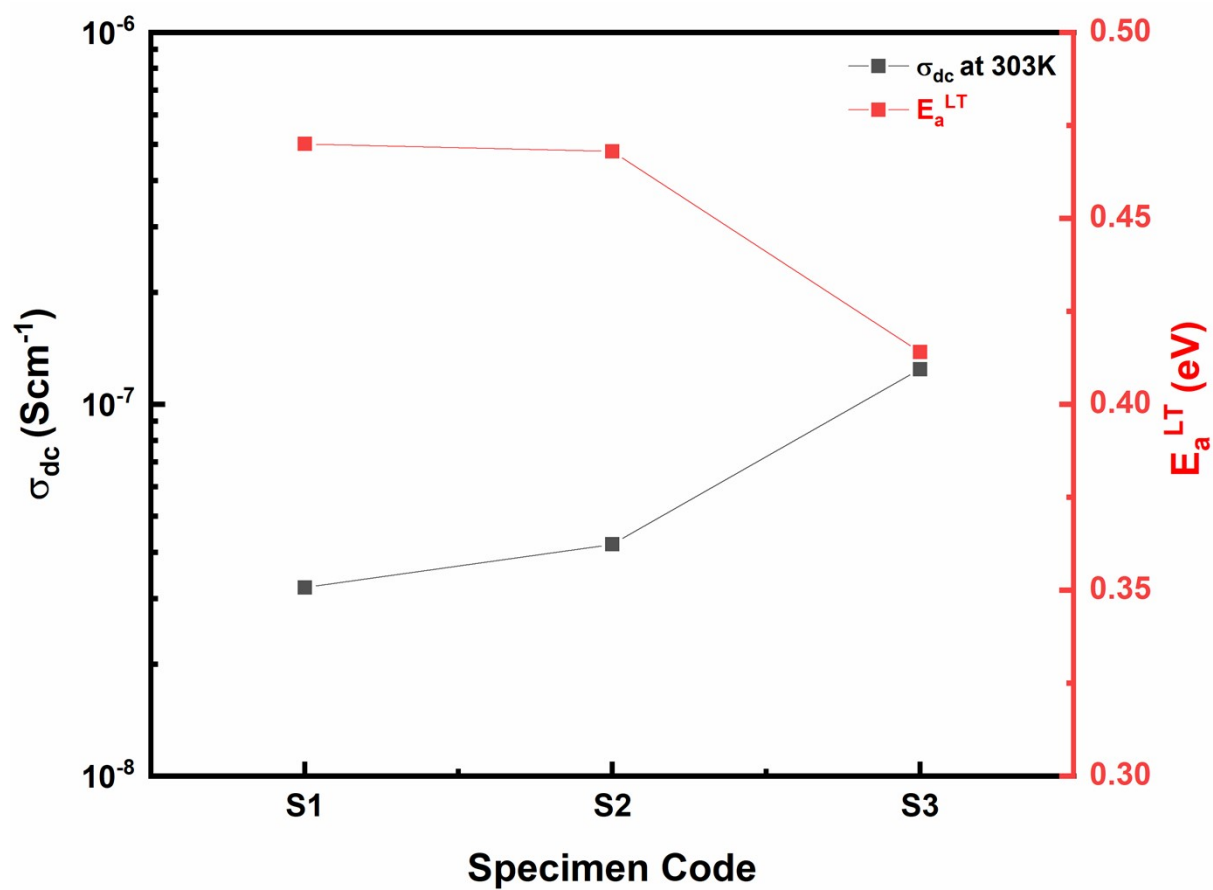

**Figure S7.** The variation of dc conductivity,  $\sigma^{(dc)}$  and activation energy (LT) for different specimens.
